# Supplementary material for: Photocatalytic degradation of phenol using a new developed TiO2/graphene/heteropoly acid nanocomposite: synthesis, characterization and process optimization
Source: Royal Society of Chemistry journal article supplement (doi:10.1039/c6ra09897e), 2016-01-01
Supplement: c6ra09897e1.pdf [file c6ra09897e1.pdf]

*Electronic Supplementary Information*

**Photocatalytic degradation of phenol using a new developed  
TiO<sub>2</sub>/graphene/heteropoly acid nanocomposite: Synthesis, characterization  
and the process optimization**

*Ezzat Rafiee<sup>a, b\*</sup>, Elham Noori<sup>b</sup>, Ali Akbar Zinatizadeh<sup>c</sup>, Hadis Zanganeh<sup>c</sup>*

*<sup>a</sup> Department of Inorganic Chemistry, Faculty of Chemistry, Razi University, Kermanshah, 67149, Iran.*

*<sup>b</sup> Institute of Nano Science and Nano Technology, Razi University, Kermanshah, 67149, Iran.*

*<sup>c</sup> Water and Wastewater Research Center, Department of Applied Chemistry, Razi University, Kermanshah, 67149, Iran*

\* Corresponding authors

Tel./Fax: +98 831-4274559; E-mail: ezzat\_rafiee@yahoo.com, e.rafiei@razi.ac.ir.

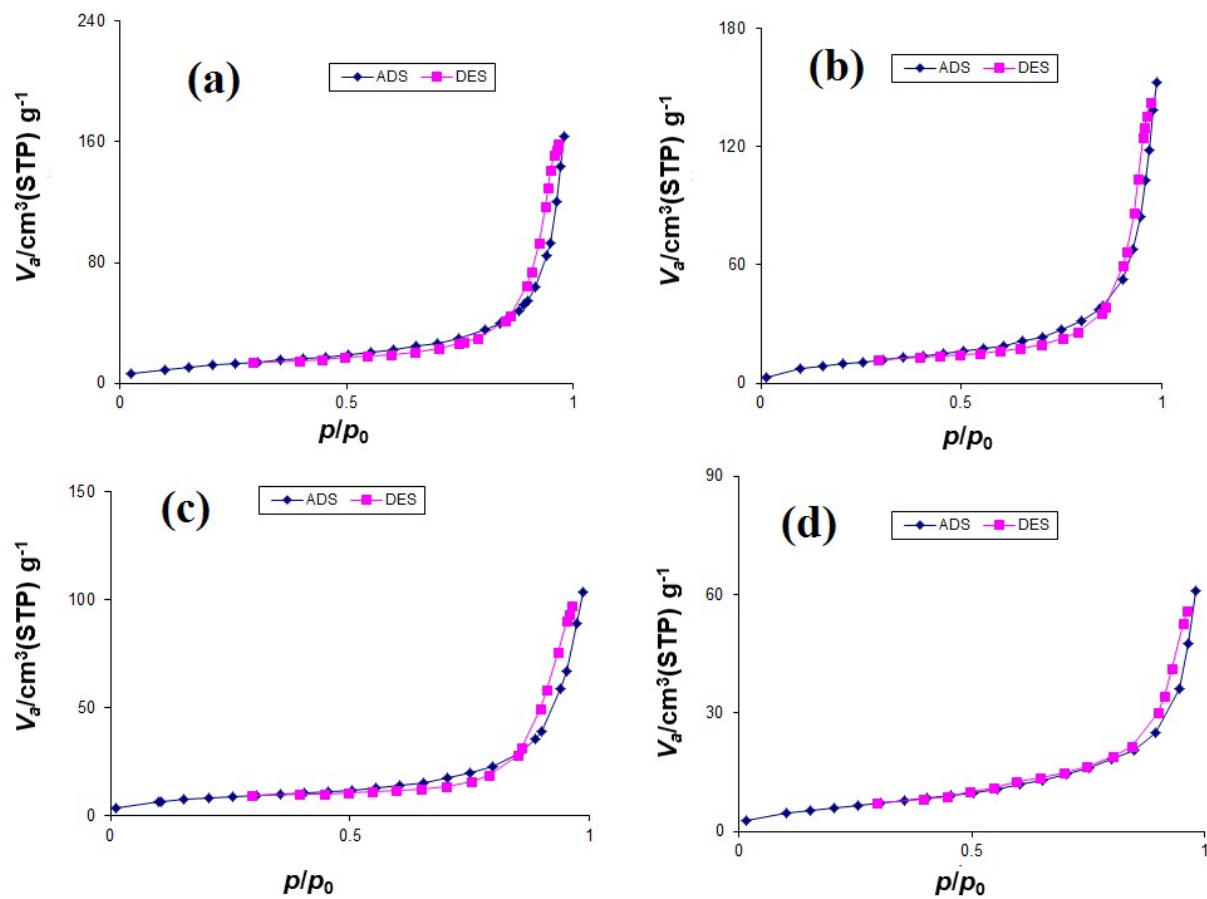

**Fig. S1.** Adsorption-desorption isotherm of (a)  $\text{TiO}_2/\text{Gr}/5\text{PW}$  (b)  $\text{TiO}_2/\text{Gr}/10 \text{PW}$  (c)  $\text{TiO}_2/\text{Gr}/20\text{PW}$  (d)  $\text{TiO}_2/\text{Gr}/40\text{PW}$  nanocomposites.

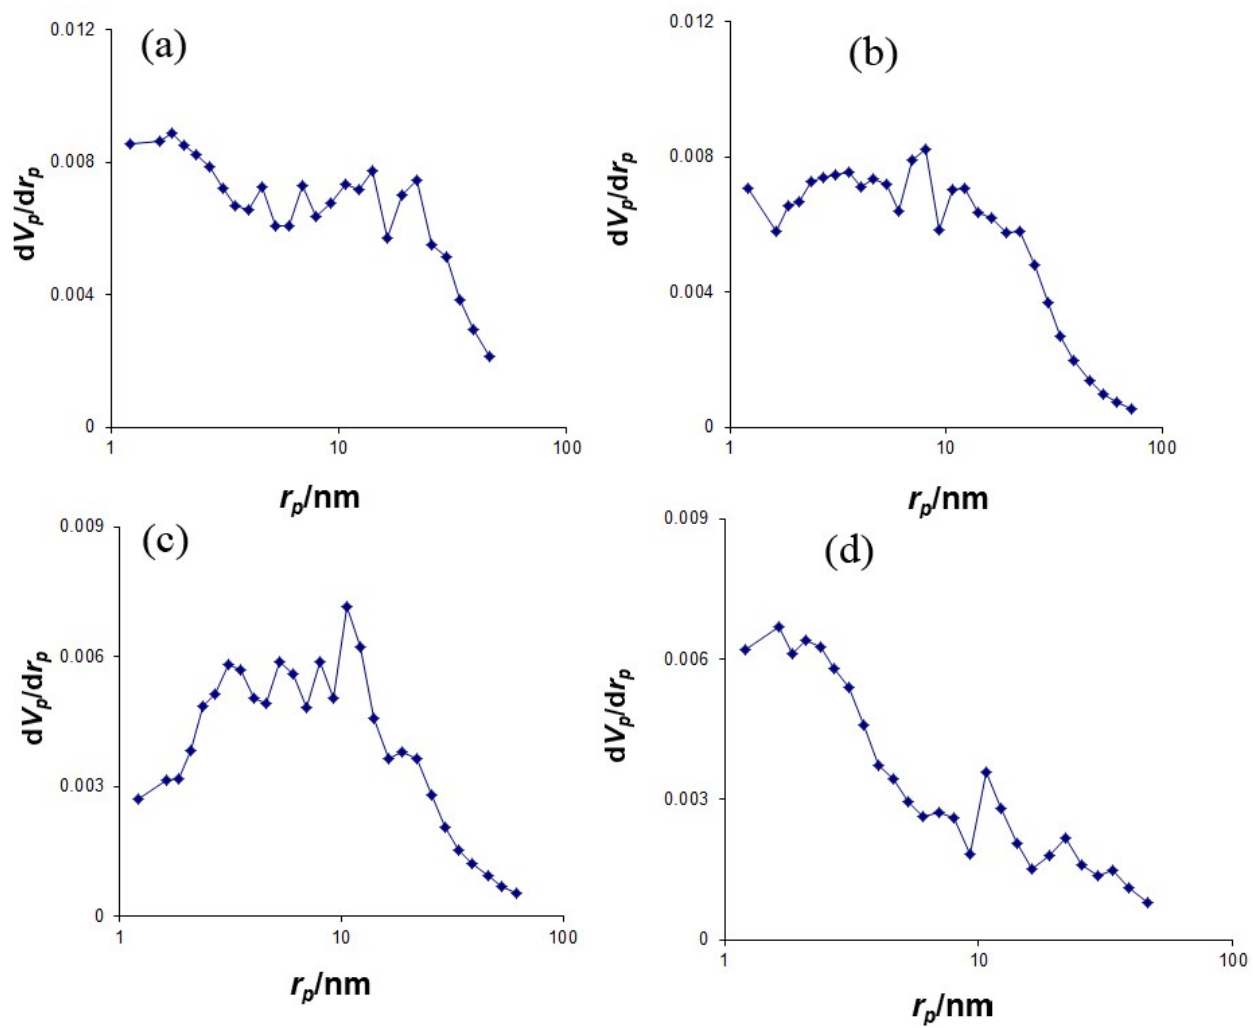

**Fig. S2.** Pore size distribution of (a) TiO<sub>2</sub>/Gr/5PW (b) TiO<sub>2</sub>/Gr/10 PW (c) TiO<sub>2</sub>/Gr/20PW (d) TiO<sub>2</sub>/Gr/40PW nanocomposites.
